# Supplementary material for: Orostachys japonicusA. Berger Extracts Induce Immunity-Enhancing Effects on Cyclophosphamide-Treated Immunosuppressed Rats
Source: Hindawi journal article supplement (doi:10.1155/2019/9461960), 2019-01-06

**Supplementary Table 1.** Flavonoid contents in the powder or extracts of *O. japonica*

| Flavonoid*             | <i>O. japonica</i><br>powder | <i>O. japonica</i><br>water extract | <i>O. japonica</i><br>ethanol extract |
|------------------------|------------------------------|-------------------------------------|---------------------------------------|
| Gallic acid            | 172.97<br>± 20.15            | 963.96<br>± 110.21                  | 335.41<br>± 96.51                     |
| Apigenin               | ND <sup>†</sup>              | ND                                  | ND                                    |
| Naringenin             | 0.14<br>± 0.03               | ND                                  | 0.84<br>± 0.07                        |
| Luteolin               | 0.60<br>± 0.06               | 0.06<br>± 0.01                      | 2.14<br>± 0.25                        |
| Kaempferol             | 63.51<br>± 7.74              | 18.65<br>± 1.13                     | 168.47<br>± 37.90                     |
| Epicatechin            | 64.47<br>± 1.78              | 405.41<br>± 17.20                   | 120.72<br>± 22.50                     |
| Catechin               | 2.41<br>± 0.47               | 1.38<br>± 0.34                      | 4.44<br>± 0.03                        |
| Quercetin              | 39.73<br>± 1.91              | 15.14<br>± 0.51                     | 114.41<br>± 20.89                     |
| Chlorogenic acid       | 0.12<br>± 0.00               | 0.12<br>± 0.08                      | 0.15<br>± 0.07                        |
| Naringin               | 0.32<br>± 0.13               | 0.39<br>± 0.07                      | 0.40<br>± 0.05                        |
| Rutin                  | 8.32<br>± 0.31               | 16.76<br>± 1.27                     | 28.11<br>± 2.87                       |
| Hesperidin             | 0.44<br>± 0.00               | 0.44<br>± 0.09                      | 0.61<br>± 0.03                        |
| Protocatechuic acid    | 13.15<br>± 0.61              | 38.02<br>± 4.91                     | 34.77<br>± 8.15                       |
| Caffeic acid           | 21.98<br>± 1.51              | 15.32<br>± 5.29                     | 25.86<br>± 12.93                      |
| Methyl caffeate        | 0.05<br>± 0.00               | 0.03<br>± 0.00                      | 0.02<br>± 0.00                        |
| Hesperetin             | ND                           | ND                                  | 0.02<br>± 0.00                        |
| ECG                    | 477.77<br>± 5.10             | 71.71<br>± 3.66                     | 635.14<br>± 133.15                    |
| Kaempferol-3-glucoside | 148.65<br>± 9.46             | 16.40<br>± 0.63                     | 330.63<br>± 89.50                     |
| EGCG                   | 757.66<br>± 164.99           | 16.04<br>± 0.62                     | 1441.44<br>± 561.14                   |
| Quercetin-3-glucoside  | 520.72<br>± 61.47            | 46.76<br>± 0.38                     | 1162.16<br>± 346.40                   |

\*, Flavonoid contents are presented in units of µg/g; †, ND, not detectable

# Supplementary Figure 1

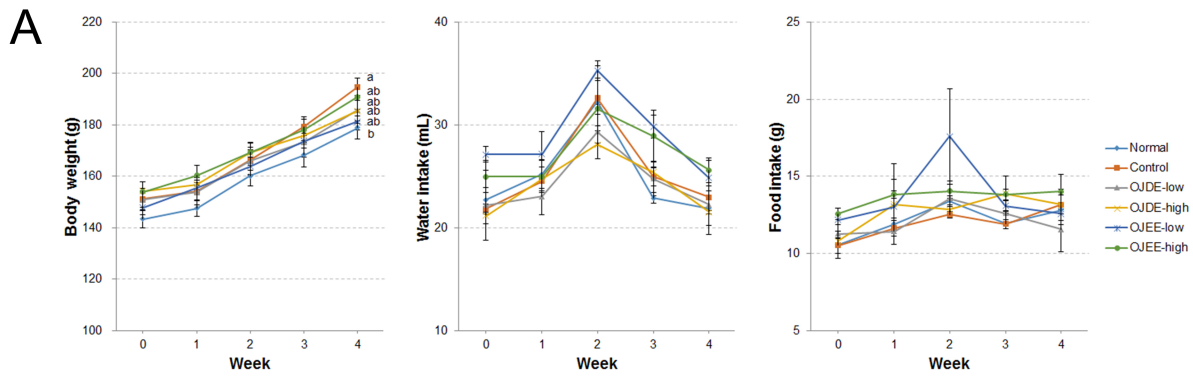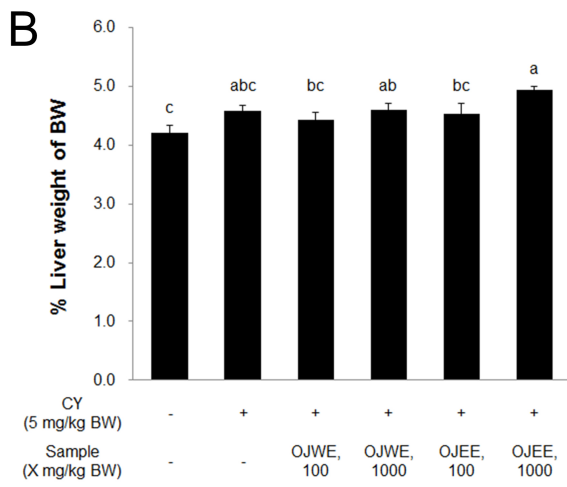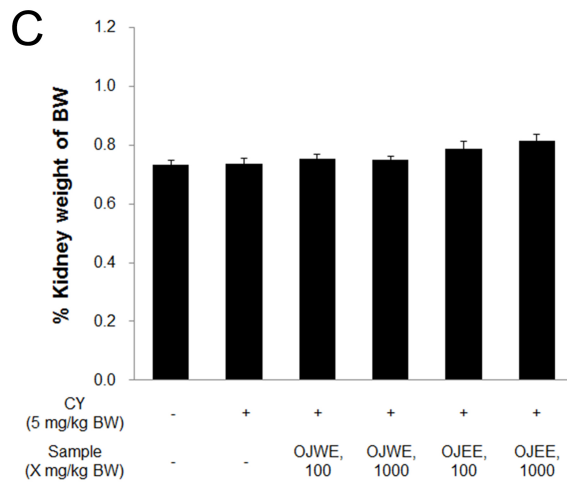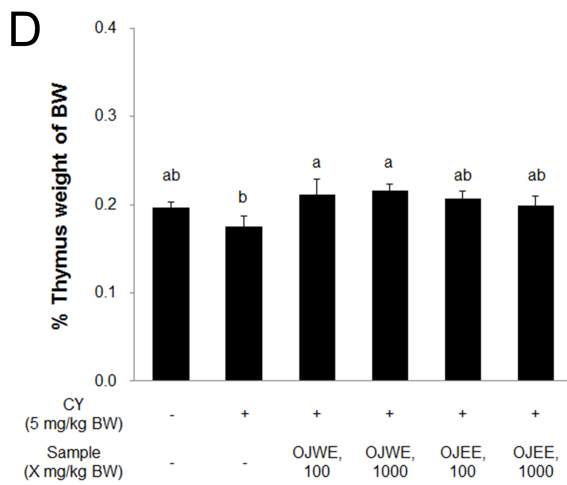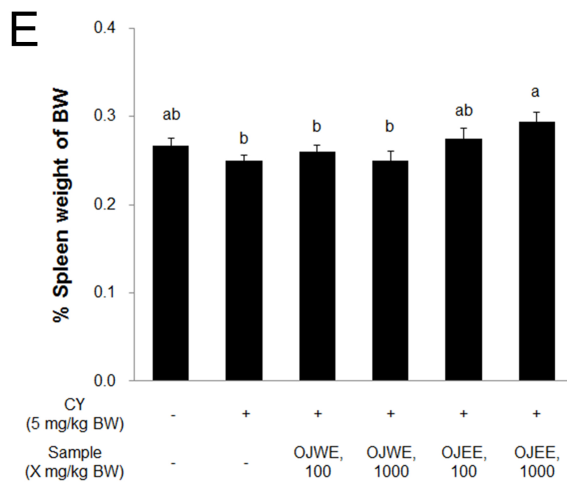

Supplement: f1 [file 9461960.f1.pdf]
